29 **Abbreviations**

30 BCa - Breast cancer

31 EDB-FN – Extradomain-B fibronectin

32 FN1 - Fibronectin

33 MRI – Magnetic resonance imaging

34 PET – Positron-emission tomography

35 CT – Computed tomography

36 TME – Tumor microenvironment

37 ECM – Extracellular matrix

38 TGF- $\beta$  – Transforming growth factor- $\beta$

39 EMT – Epithelial to mesenchymal transition

40 CEA – Carcinoembryonic antigen

41

42

43

44

45

46

47

48

49

50

51

## 52 **Summary Statement**

53 Dynamic changes in invasive properties of breast cancer cells directly influence extradomain-B  
54 fibronectin levels, suggesting its potential role as a molecular marker for active surveillance and  
55 therapeutic monitoring of breast cancer.

## 56 **Abstract**

57 Breast tumor heterogeneity is a major impediment to oncotherapy. Tumor cells undergo rapid  
58 clonal evolution, thereby acquiring significant growth and invasive advantages. The absence of  
59 specific markers of these high-risk tumors precludes efficient therapeutic and diagnostic  
60 management of breast cancer. Given the critical function of tumor microenvironment in the  
61 oncogenic circuitry, we sought to determine the role of the extracellular matrix oncoprotein,  
62 extradomain-B fibronectin (EDB-FN), as a molecular marker of aggressive cancers. High-risk  
63 invasive cell lines generated from relatively less invasive MCF7 and MDA-MB-468 breast cancer  
64 cells by long-term TGF- $\beta$  treatment and chemoresistance demonstrated hybrid epithelial-  
65 mesenchymal phenotype, enhanced motility, and significantly elevated EDB-FN levels in 2D- and  
66 3D-cultures. To determine if EDB-FN could serve as a therapy-predictive marker, the invasive cell  
67 lines were treated with MK2206-HCl, a pan-AKT inhibitor. Phospho-AKT depletion reduced  
68 EMT and invasion of the populations, with a concomitant decrease in EDB-FN expression, partly  
69 through the phosphoAKT-SRp55 pathway, demonstrating that EDB-FN expression is strongly  
70 associated with high-risk breast cancer. EDB-FN is a promising molecular marker for accurate  
71 detection, differential diagnosis, and non-invasive therapeutic surveillance of aggressive breast  
72 cancer.

73

74

75

76

77

78

## 79 **Introduction**

80 Breast cancer (BCa) is a devastating disease that accounts for 41,000 deaths each year in  
81 the US (Siegel et al., 2018). Although the survival rate for patients with localized BCa is close to  
82 99%, it declines precipitously in patients with distant metastases and drug resistance (Siegel et al.,  
83 2018, DeSantis et al., 2017). A major stumbling block in the clinical management of the disease  
84 is tumor heterogeneity, which plays a role in the dynamic nature of BCa progression (Baird and  
85 Caldas, 2013). Whole genome sequencing and profiling studies have demonstrated that breast  
86 tumors of the same histological subtype exhibit distinct molecular portraits and discrete trajectories  
87 in individual BCa patients at different stages (Tsang and Tse, 2019, Eliyatkin et al., 2015, Baird  
88 and Caldas, 2013). Stochastic mutations, genome instability, and clonal evolution arising from  
89 selective pressures from genetic, epigenetic, environmental, and therapeutic stimuli result in the  
90 emergence of high-risk tumor populations with significant growth and invasive advantages (Eccles  
91 et al., 2013, Baird and Caldas, 2013). This extensive spatial and temporal diversity within primary  
92 and metastasized tumors directly influences diagnostic, therapeutic, and prognostic outcomes  
93 (Eccles et al., 2013). In the absence of markers specific to the metastatic and invasive properties  
94 of tumors, current imaging modalities including MRI, PET, and CT are limited in their ability to  
95 detect and differentiate between low-risk and high-risk tumors (Bleyer and Welch, 2012). These  
96 facts underscore the need for the discovery and characterization of suitable molecular markers that  
97 can facilitate non-invasive detection, risk-stratification, active surveillance of breast neoplasms,  
98 and timely assessment of therapeutic response, despite their dynamic nature.

99 The tumor extracellular matrix (ECM) plays a critical role in all aspects of tumor  
100 progression, by relaying oncogenic signals between the tumor cells and the tumor  
101 microenvironment (TME) and by supporting growth, apoptotic escape, migration, inflammation,  
102 and immune evasion (Balkwill et al., 2012). Fibronectin (FN1), an integral component of normal  
103 and tumor ECM, is an essential glycoprotein that regulates adhesion, motility, growth and  
104 development (Pankov and Yamada, 2002). Its alternative splice variant called extradomain-B  
105 fibronectin (EDB-FN), however, is known to be expressed during malignant transformation, and  
106 is generally absent from healthy adult tissues (White et al., 2008, Han and Lu, 2017). Multiple  
107 lines of evidence show that EDB-FN is associated with epithelial-to-mesenchymal transition  
108 (EMT), cancer cell stemness, proliferation, angiogenesis, and metastasis, all of which reflect tumor

109 aggressiveness (Petrini et al., 2017, Sun et al., 2015, Taviani et al., 1994, Coltrini et al., 2009,  
110 Ventura et al., 2018, Han et al., 2018). Clinical studies demonstrate the presence of EDB-FN in  
111 patients with lung, brain, colorectal, ovarian, and thyroid cancers (Santimaria et al., 2003, Menzin  
112 et al., 1998, Giannini et al., 2003). The overexpression of EDB-FN is also correlated with  
113 histological grade in mammary tumors (Loridon-Rosa et al., 1990) and with poor survival in oral  
114 carcinoma patients (Lyons et al., 2001), suggesting its potential role as a marker for multiple  
115 neoplasms.

116 An added layer of complication is that even among the same cancer type, EDB-FN  
117 expression profiles are distinct and specific to the molecular and functional characteristics of the  
118 cells or tissues. For example, using an EDB-FN-specific peptide probe, ZD2-Cy5.5, we previously  
119 showed that invasive cancer cell lines, e.g., PC3 (prostate) and MDA-MB-231 (hormone receptor-  
120 negative breast cancer), are EDB-FN-rich, while the less invasive cancer cell lines, e.g., LNCaP  
121 (prostate) and MCF7 (hormone receptor-positive breast) exhibit significantly lower EDB-FN  
122 levels (Han et al., 2015, Han et al., 2017a, Han et al., 2018, Han et al., 2017b). This differential  
123 expression of EDB-FN was exploited for differentially diagnosing invasive prostate and breast  
124 cancer tumors from the non-invasive xenografts using EDB-FN-targeted MRI contrast agents  
125 (Ayat et al., 2018, Han et al., 2017a, Han et al., 2017b). Other independent groups have also used  
126 EDB-FN as a molecular target for targeted imaging and therapeutic delivery for various types of  
127 cancer (Sun et al., 2014, Ye et al., 2017, Han et al., 2019).

128 Given the high degree of tumor plasticity, it is evident that different selective pressures,  
129 environmental and experimental stimuli will bring about distinct changes in the TME and EDB-  
130 FN expression, which would in turn influence the clinical outcomes of EDB-FN-targeted imaging  
131 and therapeutic interventions. Here, we sought to determine the changes in EDB-FN expression  
132 patterns following application of two different selective pressures on non-invasive, low EDB-FN-  
133 expressing breast cancer cells and their consequent evolution into invasive high-risk populations.  
134 To this end, significant survival advantage was conferred on two breast cancer cell lines, MCF7  
135 and MDA-MB-468, by treating them with the cytokine TGF- $\beta$  and chemotherapeutic drugs to  
136 induce stochastic alternations and clonal evolution. The resulting populations were also treated  
137 with a highly specific AKT inhibitor to further assess for changes in EDB-FN levels in correlation  
138 to the response of the high-risk cells to targeted therapy.

## 139 **Results**

### 140 ***EDB-FN expression is significantly elevated in breast cancer***

141 As a critical ECM component, FN1 is overexpressed in multiple cancer types (Bae et al.,  
142 2013, Suer et al., 1996, Saito et al., 2008, Menendez et al., 2005). Here, the expression of the FN1  
143 transcript containing the EDB-FN exon (ENST00000323926) was assayed by performing  
144 differential gene expression analysis on RNA-Seq patient data from TCGA database. As shown in  
145 **Fig. 1A**, breast tumors demonstrated significant overexpression of the EDB-FN transcript,  
146 compared to normal breast tissues. Next, the endogenous levels of EDB-FN mRNA were  
147 determined across a panel of cell lines representing the multiple molecular subtypes of breast  
148 cancer (Holliday and Speirs, 2011, Arnedos et al., 2012). As shown in **Fig. 1B**, the least invasive  
149 hormone receptor-positive (HR<sup>+</sup>) MCF7 cells showed the lowest expression of EDB-FN. The more  
150 invasive triple-negative (HR<sup>-</sup>) breast cancer lines showed significant upregulation of EDB-FN  
151 levels, with 4-fold increase in MDA-MB-468 cells, 8-10-fold increase in BT549 and MDA-MB-  
152 231 cells, and a 555-fold increase in Hs578T cells. These results demonstrate that the oncofetal  
153 EDB-FN isoform is highly expressed in malignant breast phenotypes.

### 154 ***Growth and morphology changes in 2D- and 3D-cultured breast cancer cells with TGF- $\beta$*** 155 ***treatment and drug resistance***

156 To assess the changes in EDB-FN expression levels when breast cancer cells gain  
157 significant survival advantages, the two cell lines with the lowest EDB-FN expression and  
158 epithelial phenotype, namely MCF7 and MDA-MB-468 cells, were chosen. Two selective  
159 pressures were applied: 1) long-term treatment with TGF- $\beta$  (5 ng/mL) to induce EMT (Xu et al.,  
160 2009) to generate MCF7-TGF $\beta$  and MDA-MB-468-TGF $\beta$  cells and 2) acquired chemoresistance  
161 to Palbociclib, a cyclin-dependent kinase (CDK) inhibitor (Chen et al., 2018), and to Paclitaxel,  
162 an anti-microtubule agent (Barbuti and Chen, 2015), to generate MCF7-DR and MDA-MB-468-  
163 DR cells, respectively. The parent and derivative cell lines were characterized for their  
164 morphology, and molecular and functional phenotypes.

165 As shown in **Fig 2A**, MCF7 cells demonstrate a typical epithelial morphology in 2D  
166 culture. Long-term treatment with TGF- $\beta$  and development of resistance to Palbociclib resulted in  
167 morphological changes to a more mesenchymal phenotype, which was more pronounced in the

168 MCF7-DR cells than in MCF7-TGF $\beta$  cells. On the other hand, the MDA-MB-468 cells did not  
169 exhibit overt changes in morphology with TGF- $\beta$  treatment and development of resistance to  
170 Paclitaxel. However, the MDA-MB-468-TGF $\beta$  showed increased growth rate compared to the  
171 parent MDA-MB-468 cells.

172 In addition to 2D culture, the cells were grown in Matrigel to facilitate the establishment  
173 of a conducive ECM. As shown in **Fig. 2B**, in 3D culture, the low-risk HR<sup>+</sup> MCF7 cells showed  
174 negligible tumor spheroid formation while the more invasive MDA-MB-468 cells showed  
175 proliferative network formation. The MCF7-TGF $\beta$  and MCF7-DR cells formed tumor spheroids,  
176 unlike the parent MCF7 cells, while the MDA-MB-468-TGF $\beta$  and MDA-MB-468-DR cells  
177 formed similar proliferative networks as their parent counterparts. These results highlight the  
178 different properties of each cancer cell type and its distinct response to external mitogenic stimuli.

### 179 *Increased migration in breast cancer cells with TGF- $\beta$ treatment and drug resistance*

180 Next, we analyzed the molecular and functional changes in the TGF- $\beta$ -treated and drug-  
181 resistant breast cancer cells. TGF- $\beta$  is a potent inducer of EMT, a critical step towards initiation  
182 of metastasis (Fedele et al., 2017). Similarly, the signaling programs of EMT and drug resistance  
183 are intricately related, where EMT-like molecular signature can antagonize chemotherapy in breast  
184 cancer (Huang et al., 2015). Consequently, the mRNA and protein expression of the common EMT  
185 markers, N-cadherin (N-cad), E-cadherin (E-cad), and Slug (invasion marker), was tested in the  
186 derivative cell lines. As shown in **Figs. 3A-C**, MCF7-TGF $\beta$  and MCF7-DR cells showed increased  
187 EMT, evidenced by reduced E-cad and increased N-cad and Slug mRNA levels, in comparison to  
188 MCF7 cells. MDA-MB-468-TGF $\beta$  and MDA-MB-468-DR cells, however, did not demonstrate  
189 significant changes in E-cad and N-cad mRNA levels, compared to their parent cells. The mRNA  
190 expression of Slug increased only in the TGF- $\beta$ -treated MDA-MB-468 cells but not in MDA-MB-  
191 468-DR cells (**Fig. 3C**).

192 At the protein level, both MCF-TGF $\beta$  and MCF7-DR cells showed upregulated N-cad and  
193 Slug expression while the E-cad expression did not significantly decrease (**Fig. 3D**), indicating  
194 that the MCF7 cells gain a partial EMT-like phenotype with TGF- $\beta$  treatment and development of  
195 drug resistance. The MDA-MB-468-TGF $\beta$  cells showed no changes in E-cad and N-cad and a  
196 moderate increase in Slug levels while the MDA-MB-468-DR cells showed increased N-cad and  
197 Slug expression, compared to the parent cells (**Fig. 3E**). These results indicate that while both the

198 MDA-MB-468-TGF $\beta$  and MDA-MB-468-DR cells overexpress the migratory protein Slug, the  
199 former did not undergo EMT with TGF- $\beta$  treatment while the latter possibly gained a hybrid E-M  
200 phenotype with drug resistance.

201 The treated cell populations were analyzed for their ability to invade through a layer of  
202 matrigel coated in transwell inserts. As shown in **Fig. 3F**, both the TGF- $\beta$  treatment and drug  
203 resistance conferred significant invasive advantage on the MCF7 and MDA-MB-468 cells,  
204 rendering them more motile than their parent counterparts, as seen by the increased number of  
205 crystal violet-stained migrated cells. Indeed, recent studies have revealed that the partial or hybrid  
206 E-M phenotype is attributed to the tumor cell plasticity and is extremely favorable for metastatic  
207 dissemination (Kroger et al., 2019, Saitoh, 2018).

### 208 *Increased EDB-FN expression in breast cancer cells with TGF- $\beta$ treatment and drug resistance*

209 The potential role of EDB-FN as a molecular marker for breast cancer aggressiveness was  
210 then determined in TGF- $\beta$ -treated and drug-resistant MCF7 and MDA-MB-468 cells. The  
211 expression of EDB-FN in 3D-cultured cells was analyzed using fluorescent-labeled EDB-FN-  
212 specific peptide ZD2-Cy5.5 (Han et al., 2015). As shown in **Fig. 4A**, endogenous EDB-FN  
213 expression in MDA-MB-468 cells is higher than that in the MCF7 cells, consistent with the mRNA  
214 levels in **Fig. 1B**, and their invasive ability in **Fig. 3F**. Treatment with TGF- $\beta$  and acquired drug  
215 resistance led to a significant increase in EDB-FN expression in the 3D-cultured MCF7 and MDA-  
216 MB-468 cells. The EDB-FN-specific binding of the ZD2-Cy5.5 probe was confirmed by EDB-FN  
217 knockdown experiments in MDA-MB-468-DR cells, where ECO/siEDB nanoparticle treatment  
218 abrogated the ZD2-Cy5.5 binding (**Fig. 4B**). The peptide binding results from 3D culture were  
219 also corroborated by qRT-PCR analysis, which showed over 3-fold and 10-fold increase in EDB-  
220 FN expression in MCF7-TGF $\beta$  and MCF7-DR cells and about 4-fold increase in MDA-MB-468-  
221 TGF $\beta$  and MDA-MB-468-DR cells, over their respective counterparts (**Fig. 4C**). These results  
222 indicate that the acquisition of partial EMT and invasive properties by breast cancer cells results  
223 in upregulation of EDB-FN. Thus, EDB-FN overexpression is strongly upregulated in invasive  
224 breast cancer cells and in the breast cancer cells that evolve from low-risk ones.

### 225 *Therapeutic ablation of AKT in invasive breast cancer cells decreases invasion and EDB-FN* 226 *expression*



227 Non-invasive therapeutic monitoring of tumor response to oncostatic drugs is crucial to  
228 facilitate decision making and timely interventions (Eccles et al., 2013). To test whether EDB-FN  
229 is a therapy-predictive marker and if its expression correlates with changes in the invasive potential  
230 of breast cancer cells, the TGF- $\beta$ -treated and drug-resistant MCF7 and MDA-MB-468 cells were  
231 treated with MK2206-HCl, a highly specific pan-AKT inhibitor proven to suppress PI3K/AKT  
232 signaling-induced tumor cell proliferation (Hirai et al., 2010). The PI3K/AKT signaling is a major  
233 signal transduction cascade implicated in the progression, metastasis, and drug resistance of  
234 multiple cancers (Agarwal et al., 2014).

235 The upregulation of the mitogenic AKT signaling axis in the aggressive TGF- $\beta$ -treated and  
236 drug-resistant MCF7 and MDA-MB-468 cell populations was first confirmed by testing for the  
237 levels of phosphorylated AKT (T308 and S473) and total AKT (**Fig. 5A**). Both the phospho-AKT-  
238 T308 and phospho-AKT-S473 levels were strongly upregulated in the TGF- $\beta$ -treated and drug-  
239 resistant MCF7 and MDA-MB-468 cells, in addition to increased expression of total AKT in the  
240 MDA-MB-468-TGF $\beta$  cells. Treatment of the invasive cell derivatives with MK2206-HCl resulted  
241 in robust inhibition of phospho-AKT (T308 and S473), as shown in **Fig. 5B**, and subsequently  
242 reduced their invasive potential (**Fig. 5C-D**). This was accompanied by a significant decrease in  
243 the expression of EDB-FN in the EDB-FN-overexpressing TGF- $\beta$ -treated and drug-resistant  
244 MCF7 and MDA-MB-468 cells, demonstrated by the significant decrease in the mRNA levels  
245 (**Fig. 5E-F**) and reduced ZD2-Cy5.5 staining in 3D cultures (**Fig. 5G-H**), compared to the DMSO-  
246 treated controls. Additionally, the invasive cells also decreased N-cad (prominent in MDA-MB-  
247 468 cells) and Slug expression (**Fig. 5I**), in consistence with the diminished EDB-FN expression  
248 and invasiveness. These results demonstrate a positive association between EDB-FN and  
249 aggressiveness of breast cancer cell lines, and potential correlation of altered EDB-FN expression  
250 with response to therapeutic interventions.

251 Previous studies have implicated the role of phosphoAKT-SRp40 pathway in the  
252 alternative splicing-mediated regulation of EDB-FN expression (Bordeleau et al., 2015). To  
253 determine the mechanism of EDB-FN upregulation by TGF- $\beta$  treatment and drug resistance, we  
254 examined the expression of phosphorylated SR proteins (SRp55 and SRp40) in the invasive breast  
255 cancer cells before and after treatment with MK2206-HCl. As shown in **Fig. 5J**, MCF7-TGF $\beta$ ,  
256 MCF7-DR, MDA-MB-468-TGF $\beta$ , and MDA-MB-468-DR cells upregulate the expression of

257 SRp55, while only MCF7-TGF $\beta$  and MDA-MB-468-DR upregulate SRp40, compared to their  
258 respective parent counterparts. The upregulation of SRp55 was abolished in the four cell lines with  
259 MK2206-HCl treatment (**Fig. 5K**), suggesting that EDB-FN upregulation in these invasive cells  
260 could be controlled, at least in part, through the phosphoAKT-SRp55 signaling pathway.

## 261 **Discussion**

262 Numerous blood biomarkers including CA 15.3, carcinoembryonic antigen (CEA), CA125  
263 and imaging modalities like ultrasound, mammography, MRI, PET, and CT are routinely used to  
264 detect primary breast tumor disease and recurrence and to assess therapeutic response  
265 (Khatcheressian et al., 2013, Bayo et al., 2018). However, they are limited in their ability to  
266 differentially diagnose and risk-stratify the disease, with high rates of false positive diagnoses  
267 (Othman et al., 2015), underscoring the need for specific markers to accurately detect highly  
268 invasive and metastatic breast tumors, and to distinguish them from low-risk indolent ones.  
269 Moreover, breast tumors frequently exhibit intrinsic or acquired resistance to chemotherapy and  
270 targeted drugs (Huang et al., 2015). In the absence of suitable molecular markers, active  
271 surveillance and monitoring of the efficacy of chemotherapeutic interventions and timely detection  
272 of the emergence of resistant phenotypes forms another obstacle to patient treatment.

273 To address these concerns, this study investigated the dynamic changes in the ECM  
274 oncoprotein EDB-FN in conjunction with the dynamic changes in the invasive potential of breast  
275 cancer cells. We found that invasive cells that evolve from low-risk cancer cells exhibit partial  
276 EMT-like phenotypes and overexpress EDB-FN; conversely, impeding the invasive abilities of  
277 these high-risk cancer cells with a targeted drug abolishes their EDB-FN overexpression,  
278 demonstrating a direct correlation between EDB-FN levels and the invasiveness of breast cancer  
279 cells. Moreover, to our knowledge, this is the first study to report that EDB-FN is upregulated with  
280 development of drug resistance in breast cancer cells.

281 Between the two different breast cancer lines used in this work, the endogenous EDB-FN  
282 level in the least aggressive HR<sup>+</sup> MCF7 cells is significantly lower than that in the more aggressive  
283 HR<sup>-</sup> MDA-MB-468 cells, despite both lines exhibiting an epithelial phenotype. Induction of drug  
284 resistance and long-term TGF- $\beta$  treatment led to distinct changes in the molecular phenotypes of  
285 the two cell lines, possibly through distinct signaling mechanisms. Nevertheless, the emergent  
286 invasive populations became more aggressive than their parent cells, with a pre-metastatic hybrid

287 E-M phenotype and increased phospho-AKT signaling. It is also likely that each of these cell lines  
288 acquired their survival advantages through additional here-to-fore unstudied mechanisms.  
289 Nevertheless, all of the cells with acquired invasiveness presented elevated EDB-FN expression  
290 irrespective of the signaling mechanisms. Conversely, when the aggressive cells were treated with  
291 targeted therapy, their invasive potential diminished with a concomitant reduction in EDB-FN  
292 expression, indicating the role of EDB-FN as a marker for active surveillance and monitoring of  
293 therapeutic efficacy.

294 The precise mechanism of EDB-FN upregulation in invasive cells remains an enigma. At  
295 the genetic level, EDB-FN is generated by alternative splicing event, resulting in the inclusion of  
296 the EDB exon in the FN1 transcript, a process controlled by SR (Ser- and Arg-rich) proteins of the  
297 splicing regulator family (White et al., 2008, Huh and Hynes, 1994). Since alternative splicing is  
298 indispensable for the formation of the EDB-FN isoform, the participation of the SR proteins in this  
299 process is inevitable. However, there is limited research on the underlying mechanism of the  
300 preferential and differential inclusion of the EDB exon during neoplastic transformation. Previous  
301 studies show that increased tissue stiffness directly upregulates PI3K/AKT-mediated SRp40  
302 phosphorylation, enhancing exon inclusion and EDB-FN secretion by breast cancer cells  
303 (Bordeleau et al., 2015). In this work, development of drug resistance and TGF- $\beta$  treatment in  
304 MCF7 and MDA-MB-468 cells consistently upregulated SRp55 phosphorylation, in addition to  
305 increased phospho-AKT and SRp40 levels. MK2206-HCl treatment showed highly specific  
306 knockdown of phospho-AKT and consequent downregulation of SRp40/SRp55 levels in a cell-  
307 specific manner. While the MK2206-HCl treatment significantly reduced EDB-FN expression and  
308 invasion, it did not completely abrogate them, suggesting the compensatory activation of other  
309 mitogenic proteins (like AKT3) (Stottrup et al., 2016) or the EDA-FN isoform, which is also  
310 involved in tumorigenesis (Han and Lu, 2017).

311 EDB-FN is overexpressed in multiple types of cancer, including breast, colorectal, oral,  
312 bladder, lung, and prostate (Bae et al., 2013, Lyons et al., 2001, Inufusa et al., 1995, Arnold et al.,  
313 2016, Khan et al., 2005, Albrecht et al., 1999). Originally thought to be secreted only by cancer-  
314 associated fibroblasts (CAFs) and endothelial cells, EDB-FN is now known to be abundantly  
315 produced by tumor cells, especially invasive tumor cells (Han and Lu, 2017). EDB-FN is  
316 upregulated during embryogenesis, temporally activated during wound healing, tissue repair, and

317 angiogenesis, but mostly absent from healthy adult tissues (White et al., 2008). Additionally, by  
318 virtue of its extracellular location and ready accessibility, EDB-FN has emerged as an attractive  
319 target for designing new diagnostic and therapeutic regimens. Previous studies have already  
320 demonstrated the potential of antibody-mediated EDB-FN targeting (using L19, BC-1) for  
321 angiogenesis, inflammation, and cancer stem cell therapy (Mariani et al., 1997, Tijink et al., 2009).  
322 EDB-FN-specific peptides, such as ZD2 and APT<sub>EDB</sub>, are advantageous for oncogenic ECM  
323 targeting, by virtue of their small size, low immunogenicity, and high tissue penetration ability  
324 (Han et al., 2015, Sun et al., 2014, Zahnd et al., 2010). The specificity and superior binding of the  
325 ZD2 probe for EDB-FN has direct translational implications. We have successfully demonstrated  
326 differential diagnosis of non-invasive and invasive breast and prostate cancer xenografts in mouse  
327 models using ZD2-targeted MRI contrast agents (Han et al., 2017a, Han et al., 2018, Han et al.,  
328 2017b, Ayat et al., 2018). The results of this study open up new avenues for determining the  
329 potential of EDB-FN as a molecular biomarker for molecular imaging-based detection, risk-  
330 stratification, active surveillance, and monitoring of breast cancers and tracking their evolution as  
331 the disease progresses with and without chemotherapy.

332 In summary, this research demonstrates that EDB-FN expression is strongly associated  
333 with highly invasive breast cancer and with low-risk cells that evolve into high-risk cancer.  
334 Further, this correlation holds true despite cancer cell plasticity, and dynamic changes occurring  
335 in the invasive properties of breast cancer cells lead to corresponding changes in the EDB-FN  
336 expression levels. These observations indicate that EDB-FN is a promising molecular marker for  
337 monitoring the progression of breast cancer, in the context of diagnostic imaging and therapeutic  
338 interventions.

## 339 **Materials and Methods**

### 340 *Cell lines and culture*

341 MCF7, MDA-MB-231, BT549, and Hs578T cells were purchased from ATCC (Manassas,  
342 VA). MCF7-DR cells (resistant to 500 nM Palbociclib), MDA-MB-468, and MDA-MB-468-DR  
343 (resistant to 100 nM Paclitaxel) cells were a kind gift from Dr. Ruth Keri (CWRU, Cleveland,  
344 OH). MCF7-TGF- $\beta$  and MDA-MB-468-TGF- $\beta$  cells were obtained by treating the parent lines  
345 with 5 ng/mL TGF- $\beta$  (RnD Systems, Minneapolis, MN) for at least 7-10 days. The breast cancer  
346 lines were cultured in Dulbecco's Modified Eagle's Medium (DMEM) supplemented with 10%

347 fetal bovine serum (FBS), and 1% Penicillin/Streptomycin (P/S). MCF7, MCF7-DR, and Hs578T  
348 cells were additionally supplemented with 0.01 mg/mL human insulin (Sigma-Aldrich, St. Louis,  
349 MO). All the cells were grown at 37°C and 5% CO<sub>2</sub>. The cell lines were tested for the absence of  
350 mycoplasma using the MycoAlert™ Mycoplasma Detection Kit (Lonza, Allendale, NJ). Cell lines  
351 were also authenticated by Genetica DNA Laboratories (Burlington, NC).

### 352 ***MK2206-HCl treatment***

353 The invasive TGF-β-treated and drug-resistant MCF7 and MDA-MB-468 populations  
354 were treated with MK2206-HCl, a pan-AKT inhibitor (Agarwal et al., 2014), purchased from  
355 SelleckChem (Boston, MA). For this treatment,  $8 \times 10^5$  cells were plated on 6-well plates. After  
356 24 h of attachment, the cells were treated with MK2206-HCl for 2 days (2 μM dose for MCF7  
357 cells and 4 μM dose for MDA-MB-468 cells). Cells treated with equivalent volume of DMSO  
358 were used as controls. After treatment, a portion of the cells was harvested for protein and RNA  
359 extraction for western blotting and qRT-PCR. The rest of the cells were plated on Matrigel and in  
360 transwell inserts for the invasion and 3D growth assays, as described in the relevant sections,  
361 respectively.

### 362 ***TCGA analysis***

363 RNA-Seq data was mined from the TCGA database for the FN1 transcript containing the  
364 EDB-FN exon (ENST00000323926). Differential gene expression analysis was performed in 104  
365 normal and 790 breast tumor samples. Statistical analysis and graph plotting was performed using  
366 Graphpad Prism.

### 367 ***qRT-PCR***

368 Total RNA was extracted from cells and tissues using the RNeasy Plus Mini Kit (Qiagen,  
369 Germantown, MD), according to manufacturer's instructions. Reverse transcription was  
370 performed using the miScript II RT Kit (Qiagen) and qPCR was performed using the SyBr Green  
371 PCR Master Mix (Applied Biosystems, CA). Gene expression was analyzed by the 2<sup>-ΔΔCt</sup> method  
372 with 18S and β-actin levels as the control. The following primer sequences were used, EDB-FN:  
373 Fwd 5'-CCGCTAAACTCTCCACCATTA-3' and Rev 5'-AGCCCTGTGACTGTGTAGTA-3';  
374 FN1: Fwd 5'- CCTGGAGTACAATGTCAGTG-3' and Rev 5'- GGTGGAGCCCAGGTGACA-  
375 3'; 18S: Fwd 5'-TCAAGAACGAAAGTCGGAGG-3' and Rev 5'-GGACATCTAAGGGCATC

376 ACA-3';  $\beta$ -actin Fwd 5'- GTTGTCGACGACGAGCG-3' and Rev 5'-AGCACAGAGCCTCGC  
377 CTTT-3'

### 378 ***3D tumor spheroid growth and ZD2-Cy5.5 staining***

379 For the Matrigel growth assay,  $5 \times 10^5$  breast cancer cells were suspended in 5% Matrigel-  
380 containing media and plated on a thick layer of Corning™ Matrigel™ Membrane Matrix. The  
381 ability of the cells to form tumor spheroids in the 3D Matrix was monitored and photographed for  
382 up to 5 days using the Moticam T2 camera. After 5 days, the cells were stained with Hoechst  
383 (1:2000) and ZD2-Cy5.5 (100 nM) for 1 h. After 3 washes of PBS, fresh media was added and the  
384 cells were imaged by confocal microscopy on Olympus confocal microscope.

### 385 ***Western blot***

386 Total cellular protein was extracted as previously described (Vaidya et al., 2019). Protein  
387 extracts (40  $\mu$ g) were run on SDS-PAGE, transferred onto nitrocellulose membrane and  
388 immunoblotted with primary antibodies overnight. The following primary antibodies (1:1000  
389 dilution) were purchased from Cell Signaling Technology (Danvers, MA): anti-E-cadherin  
390 (Cat#3195), anti-Slug (Cat#9585), anti-phospho-T308-AKT (Cat#13038), anti-phospho-S473-  
391 AKT (Cat#4060), anti-pan-AKT (Cat#4691), and anti- $\beta$ -actin (loading control, Cat#4970). The  
392 anti-Phosphoepitope SR proteins (Cat#MABE50; clone 1H4) and anti-SRp40 (Cat#06-1365)  
393 antibodies were purchased from Millipore Sigma (Temecula, CA) and used at 1:500 dilution. Anti-  
394 N-Cadherin antibody (Cat#76057) was purchased from Abcam (Cambridge, MA) and used at  
395 1:500 dilution.

### 396 ***Transwell assay***

397 For the invasion assay, breast cancer cells were starved in serum-depleted media overnight.  
398 The next day,  $1-2 \times 10^5$  cells were plated in transwell inserts (VWR, Radnor, PA) coated with 0.3  
399 mg/mL Corning™ Matrigel™ Membrane Matrix (Corning, NY). After 2 days, the inserts were  
400 swabbed with Q-tips to remove the plated cells. The invading cells on the bottom of the inserts  
401 were fixed with 4% paraformaldehyde followed by staining with 0.1% crystal violet for 20 min.  
402 Excess stain was washed under tap water and images of the purple migrated cells were taken using  
403 the Moticam T2 camera.

#### 404 ***EDB-FN knockdown***

405 ECO/siRNA nanoparticles were formulated as previously described (Gujrati et al., 2016).  
406 Briefly, the cationic lipid ECO (5 mM stock in ethanol) was mixed with siEDB or siLuc (as  
407 negative control NC) at a final siRNA concentration of 100 nM and N/P = 10 for 30 min to enable  
408 self-assembly formation of ECO/siEDB or ECO/NC nanoparticles, respectively. For transfections,  
409 the nanoparticle formulation was mixed with culture media and added on to MDA-MB-468-DR  
410 cells. After 48 h, the cells were stained with ZD2-Cy5.5 as described above. The siEDB duplex  
411 [sense 5'- GCA UCG GCC UGA GGU GGA CTT-3' and antisense 5'- GUC CAC CUC AGG CCG  
412 AUG CTT-3'] was purchased from IDT (Coralville, IA). The siLuc duplex [sense 5'- CCU ACG  
413 CCG AGU ACU UCG AdTdT-3' and antisense 5'-dTdT GGA UGC GGC UCA UGA AGC U-3']  
414 was purchased from Dharmacon (Lafayette, CO).

#### 415 ***Statistical analyses***

416 All the experiments were independently performed in triplicates (n = 3). Data are represented as  
417 mean  $\pm$  s.e.m. Statistical analysis was performed using Graphpad Prism. Data between two groups  
418 was compared using unpaired Student's *t*-test.  $p < 0.05$  was considered to be statistically  
419 significant.

#### 420 **Acknowledgements**

421 We are thankful to Dr. Zheng Han for providing the ZD2-Cy5.5 probe and to Dr. Nadia  
422 Ayat for her helpful comments.

#### 423 **Competing Interests**

424 ZRL is a cofounder of Molecular Theranostics, LLC, a startup company focusing on the  
425 commercialization of imaging technologies for EDB-FN. The other authors declare that they have  
426 no conflict of interest.

#### 427 **Funding**

428 This research was supported by the National Cancer Institute of the National Institutes of Health  
429 under Award Number R01 CA194518, R01 CA211762, and R01 CA235152. ZRL is M. Frank  
430 Rudy and Margaret Domiter Rudy Professor of Biomedical Engineering.

431 **Contributions**

432 The conceptual design of the research was devised by AMV and ZRL. Experimental  
433 execution of all aspects of the research was done by AMV. VQ and HW participated in cell culture,  
434 qRT-PCR, western blot, and *in vitro* functional assays. The manuscript was written and edited by  
435 AMV and ZRL.

436 **References**

- 437 AGARWAL, E., CHAUDHURI, A., LEIPHRAKAM, P. D., HAFERBIER, K. L., BRATTAIN,  
438 M. G. & CHOWDHURY, S. 2014. Akt inhibitor MK-2206 promotes anti-tumor activity  
439 and cell death by modulation of AIF and Ezrin in colorectal cancer. *BMC Cancer*, 14, 145.
- 440 ALBRECHT, M., RENNEBERG, H., WENNEMUTH, G., MOSCHLER, O., JANSSEN, M.,  
441 AUMULLER, G. & KONRAD, L. 1999. Fibronectin in human prostatic cells in vivo and  
442 in vitro: expression, distribution, and pathological significance. *Histochem Cell Biol*, 112,  
443 51-61.
- 444 ARNEDOS, M., BIHAN, C., DELALOGUE, S. & ANDRE, F. 2012. Triple-negative breast cancer:  
445 are we making headway at least? *Ther Adv Med Oncol*, 4, 195-210.
- 446 ARNOLD, S. A., LOOMANS, H. A., KETOVA, T., ANDL, C. D., CLARK, P. E. & ZIJLSTRA,  
447 A. 2016. Urinary oncofetal ED-A fibronectin correlates with poor prognosis in patients  
448 with bladder cancer. *Clin Exp Metastasis*, 33, 29-44.
- 449 AYAT, N. R., QIN, J. C., CHENG, H., ROELLE, S., GAO, S., LI, Y. & LU, Z. R. 2018.  
450 Optimization of ZD2 Peptide Targeted Gd(HP-DO3A) for Detection and Risk-  
451 Stratification of Prostate Cancer with MRI. *ACS Med Chem Lett*, 9, 730-735.
- 452 BAE, Y. K., KIM, A., KIM, M. K., CHOI, J. E., KANG, S. H. & LEE, S. J. 2013. Fibronectin  
453 expression in carcinoma cells correlates with tumor aggressiveness and poor clinical  
454 outcome in patients with invasive breast cancer. *Hum Pathol*, 44, 2028-37.
- 455 BAIRD, R. D. & CALDAS, C. 2013. Genetic heterogeneity in breast cancer: the road to  
456 personalized medicine? *BMC Med*, 11, 151.
- 457 BALKWILL, F. R., CAPASSO, M. & HAGEMANN, T. 2012. The tumor microenvironment at a  
458 glance. *J Cell Sci*, 125, 5591-6.



- 459 BARBUTI, A. M. & CHEN, Z. S. 2015. Paclitaxel Through the Ages of Anticancer Therapy:  
460 Exploring Its Role in Chemoresistance and Radiation Therapy. *Cancers (Basel)*, 7, 2360-  
461 71.
- 462 BAYO, J., CASTANO, M. A., RIVERA, F. & NAVARRO, F. 2018. Analysis of blood markers  
463 for early breast cancer diagnosis. *Clin Transl Oncol*, 20, 467-475.
- 464 BLEYER, A. & WELCH, H. G. 2012. Effect of three decades of screening mammography on  
465 breast-cancer incidence. *N Engl J Med*, 367, 1998-2005.
- 466 BORDELEAU, F., CALIFANO, J. P., NEGRON ABRIL, Y. L., MASON, B. N., LAVALLEY,  
467 D. J., SHIN, S. J., WEISS, R. S. & REINHART-KING, C. A. 2015. Tissue stiffness  
468 regulates serine/arginine-rich protein-mediated splicing of the extra domain B-fibronectin  
469 isoform in tumors. *Proc Natl Acad Sci U S A*, 112, 8314-9.
- 470 CHEN, F., LIU, C., ZHANG, J., XU, W. & ZHANG, Y. 2018. Progress of CDK4/6 Inhibitor  
471 Palbociclib in the Treatment of Cancer. *Anticancer Agents Med Chem*, 18, 1241-1251.
- 472 COLTRINI, D., RONCA, R., BELLERI, M., ZARDI, L., INDRACCOLO, S., SCARLATO, V.,  
473 GIAVAZZI, R. & PRESTA, M. 2009. Impact of VEGF-dependent tumour micro-  
474 environment on EDB fibronectin expression by subcutaneous human tumour xenografts in  
475 nude mice. *J Pathol*, 219, 455-62.
- 476 DESANTIS, C. E., MA, J., GODING SAUER, A., NEWMAN, L. A. & JEMAL, A. 2017. Breast  
477 cancer statistics, 2017, racial disparity in mortality by state. *CA Cancer J Clin*, 67, 439-  
478 448.
- 479 ECCLES, S. A., ABOAGYE, E. O., ALI, S., ANDERSON, A. S., ARMES, J.,  
480 BERDITCHEVSKI, F., BLAYDES, J. P., BRENNAN, K., BROWN, N. J., BRYANT, H.  
481 E., BUNDRED, N. J., BURCHELL, J. M., CAMPBELL, A. M., CARROLL, J. S.,  
482 CLARKE, R. B., COLES, C. E., COOK, G. J., COX, A., CURTIN, N. J., DEKKER, L.  
483 V., SILVA IDOS, S., DUFFY, S. W., EASTON, D. F., ECCLES, D. M., EDWARDS, D.  
484 R., EDWARDS, J., EVANS, D., FENLON, D. F., FLANAGAN, J. M., FOSTER, C.,  
485 GALLAGHER, W. M., GARCIA-CLOSAS, M., GEE, J. M., GESCHER, A. J., GOH, V.,  
486 GROVES, A. M., HARVEY, A. J., HARVIE, M., HENNESSY, B. T., HISCOX, S.,  
487 HOLEN, I., HOWELL, S. J., HOWELL, A., HUBBARD, G., HULBERT-WILLIAMS,  
488 N., HUNTER, M. S., JASANI, B., JONES, L. J., KEY, T. J., KIRWAN, C. C., KONG, A.,  
489 KUNKLER, I. H., LANGDON, S. P., LEACH, M. O., MANN, D. J., MARSHALL, J. F.,

- 490 MARTIN, L., MARTIN, S. G., MACDOUGALL, J. E., MILES, D. W., MILLER, W. R.,  
491 MORRIS, J. R., MOSS, S. M., MULLAN, P., NATRAJAN, R., O'CONNOR, J. P.,  
492 O'CONNOR, R., PALMIERI, C., PHAROAH, P. D., RAKHA, E. A., REED, E.,  
493 ROBINSON, S. P., SAHAI, E., SAXTON, J. M., SCHMID, P., SMALLEY, M. J.,  
494 SPEIRS, V., STEIN, R., STINGL, J., STREULI, C. H., TUTT, A. N., VELIKOVA, G.,  
495 WALKER, R. A., WATSON, C. J., WILLIAMS, K. J., YOUNG, L. S. & THOMPSON,  
496 A. M. 2013. Critical research gaps and translational priorities for the successful prevention  
497 and treatment of breast cancer. *Breast Cancer Res*, 15, R92.
- 498 ELIYATKIN, N., YALCIN, E., ZENGEL, B., AKTAS, S. & VARDAR, E. 2015. Molecular  
499 Classification of Breast Carcinoma: From Traditional, Old-Fashioned Way to A New Age,  
500 and A New Way. *J Breast Health*, 11, 59-66.
- 501 FEDELE, M., CERCHIA, L. & CHIAPPETTA, G. 2017. The Epithelial-to-Mesenchymal  
502 Transition in Breast Cancer: Focus on Basal-Like Carcinomas. *Cancers (Basel)*, 9.
- 503 GIANNINI, R., FAVIANA, P., CAVINATO, T., ELISEI, R., PACINI, F., BERTI, P.,  
504 FONTANINI, G., UGOLINI, C., CAMACCI, T., DE IESO, K., MICCOLI, P.,  
505 PINCHERA, A. & BASOLO, F. 2003. Galectin-3 and oncofetal-fibronectin expression in  
506 thyroid neoplasia as assessed by reverse transcription-polymerase chain reaction and  
507 immunochemistry in cytologic and pathologic specimens. *Thyroid*, 13, 765-70.
- 508 GUJRATI, M., VAIDYA, A. M., MACK, M., SNYDER, D., MALAMAS, A. & LU, Z. R. 2016.  
509 Targeted Dual pH-Sensitive Lipid ECO/siRNA Self-Assembly Nanoparticles Facilitate In  
510 Vivo Cytosolic siRNA Delivery and Overcome Paclitaxel Resistance in Breast Cancer  
511 Therapy. *Adv Healthc Mater*, 5, 2882-2895.
- 512 HAN, Z., CHENG, H., PARVANI, J. G., ZHOU, Z. & LU, Z. R. 2018. Magnetic resonance  
513 molecular imaging of metastatic breast cancer by targeting extracellular matrix fibronectin in  
514 the tumor microenvironment. *Magn Reson Med*, 79, 3135-3143.
- 515 HAN, Z., LI, Y., ROELLE, S., ZHOU, Z., LIU, Y., SABATELLE, R., DESANTO, A., YU, X.,  
516 ZHU, H., MAGI-GALLUZZI, C. & LU, Z. R. 2017a. Targeted Contrast Agent Specific to  
517 an Oncoprotein in Tumor Microenvironment with the Potential for Detection and Risk  
518 Stratification of Prostate Cancer with MRI. *Bioconjug Chem*, 28, 1031-1040.
- 519 HAN, Z. & LU, Z. R. 2017. Targeting Fibronectin for Cancer Imaging and Therapy. *J Mater Chem*  
520 *B*, 5, 639-654.

- 521 HAN, Z., WU, X., ROELLE, S., CHEN, C., SCHIEMANN, W. P. & LU, Z. R. 2017b. Targeted  
522 gadofullerene for sensitive magnetic resonance imaging and risk-stratification of breast  
523 cancer. *Nat Commun*, 8, 692.
- 524 HAN, Z., ZHANG, S., FUJIWARA, K., ZHANG, J., LI, Y., LIU, J., VAN ZIJL, P. C. M., LU, Z.  
525 R., ZHENG, L. & LIU, G. 2019. Extradomain-B Fibronectin-Targeted Dextran-Based  
526 Chemical Exchange Saturation Transfer Magnetic Resonance Imaging Probe for Detecting  
527 Pancreatic Cancer. *Bioconjug Chem*, 30, 1425-1433.
- 528 HAN, Z., ZHOU, Z., SHI, X., WANG, J., WU, X., SUN, D., CHEN, Y., ZHU, H., MAGI-  
529 GALLUZZI, C. & LU, Z. R. 2015. EDB Fibronectin Specific Peptide for Prostate Cancer  
530 Targeting. *Bioconjug Chem*, 26, 830-8.
- 531 HIRAI, H., SOOTOME, H., NAKATSURU, Y., MIYAMA, K., TAGUCHI, S., TSUJIOKA, K.,  
532 UENO, Y., HATCH, H., MAJUMDER, P. K., PAN, B. S. & KOTANI, H. 2010. MK-  
533 2206, an allosteric Akt inhibitor, enhances antitumor efficacy by standard  
534 chemotherapeutic agents or molecular targeted drugs in vitro and in vivo. *Mol Cancer Ther*,  
535 9, 1956-67.
- 536 HOLLIDAY, D. L. & SPEIRS, V. 2011. Choosing the right cell line for breast cancer research.  
537 *Breast Cancer Res*, 13, 215.
- 538 HUANG, J., LI, H. & REN, G. 2015. Epithelial-mesenchymal transition and drug resistance in  
539 breast cancer (Review). *Int J Oncol*, 47, 840-8.
- 540 HUH, G. S. & HYNES, R. O. 1994. Regulation of alternative pre-mRNA splicing by a novel  
541 repeated hexanucleotide element. *Genes Dev*, 8, 1561-74.
- 542 INUFUSA, H., NAKAMURA, M., ADACHI, T., NAKATANI, Y., SHINDO, K., YASUTOMI,  
543 M. & MATSUURA, H. 1995. Localization of oncofetal and normal fibronectin in  
544 colorectal cancer. Correlation with histologic grade, liver metastasis, and prognosis.  
545 *Cancer*, 75, 2802-8.
- 546 KHAN, Z. A., CAURTERO, J., BARBIN, Y. P., CHAN, B. M., UNIYAL, S. & CHAKRABARTI,  
547 S. 2005. ED-B fibronectin in non-small cell lung carcinoma. *Exp Lung Res*, 31, 701-11.
- 548 KHATCHERESSIAN, J. L., HURLEY, P., BANTUG, E., ESSERMAN, L. J., GRUNFELD, E.,  
549 HALBERG, F., HANTEL, A., HENRY, N. L., MUSS, H. B., SMITH, T. J., VOGEL, V.  
550 G., WOLFF, A. C., SOMERFIELD, M. R., DAVIDSON, N. E. & AMERICAN SOCIETY  
551 OF CLINICAL, O. 2013. Breast cancer follow-up and management after primary

552 treatment: American Society of Clinical Oncology clinical practice guideline update. *J Clin*  
553 *Oncol*, 31, 961-5.

554 KROGER, C., AFEYAN, A., MRAZ, J., EATON, E. N., REINHARDT, F., KHODOR, Y. L.,  
555 THIRU, P., BIERIE, B., YE, X., BURGE, C. B. & WEINBERG, R. A. 2019. Acquisition  
556 of a hybrid E/M state is essential for tumorigenicity of basal breast cancer cells. *Proc Natl*  
557 *Acad Sci U S A*, 116, 7353-7362.

558 LORIDON-ROSA, B., VIELH, P., MATSUURA, H., CLAUSEN, H., CUADRADO, C. &  
559 BURTIN, P. 1990. Distribution of oncofetal fibronectin in human mammary tumors:  
560 immunofluorescence study on histological sections. *Cancer Res*, 50, 1608-12.

561 LYONS, A. J., BATEMAN, A. C., SPEDDING, A., PRIMROSE, J. N. & MANDEL, U. 2001.  
562 Oncofetal fibronectin and oral squamous cell carcinoma. *Br J Oral Maxillofac Surg*, 39,  
563 471-7.

564 MARIANI, G., LASKU, A., BALZA, E., GAGGERO, B., MOTTA, C., DI LUCA, L.,  
565 DORCARATTO, A., VIALE, G. A., NERI, D. & ZARDI, L. 1997. Tumor targeting  
566 potential of the monoclonal antibody BC-1 against oncofetal fibronectin in nude mice  
567 bearing human tumor implants. *Cancer*, 80, 2378-84.

568 MENENDEZ, V., FERNANDEZ-SUAREZ, A., GALAN, J. A., PEREZ, M. & GARCIA-LOPEZ,  
569 F. 2005. Diagnosis of bladder cancer by analysis of urinary fibronectin. *Urology*, 65, 284-  
570 9.

571 MENZIN, A. W., LORET DE MOLA, J. R., BILKER, W. B., WHEELER, J. E., RUBIN, S. C. &  
572 FEINBERG, R. F. 1998. Identification of oncofetal fibronectin in patients with advanced  
573 epithelial ovarian cancer: detection in ascitic fluid and localization to primary sites and  
574 metastatic implants. *Cancer*, 82, 152-8.

575 OTHMAN, E., WANG, J., SPRAGUE, B. L., ROUNDS, T., JI, Y., HERSCHORN, S. D. &  
576 WOOD, M. E. 2015. Comparison of false positive rates for screening breast magnetic  
577 resonance imaging (MRI) in high risk women performed on stacked versus alternating  
578 schedules. *Springerplus*, 4, 77.

579 PANKOV, R. & YAMADA, K. M. 2002. Fibronectin at a glance. *J Cell Sci*, 115, 3861-3.

580 PETRINI, I., BARACHINI, S., CARNICELLI, V., GALIMBERTI, S., MODEO, L., BONI, R.,  
581 SOLLINI, M. & ERBA, P. A. 2017. ED-B fibronectin expression is a marker of epithelial-  
582 mesenchymal transition in translational oncology. *Oncotarget*, 8, 4914-4921.

- 583 SAITO, N., NISHIMURA, H. & KAMEOKA, S. 2008. Clinical significance of fibronectin  
584 expression in colorectal cancer. *Mol Med Rep*, 1, 77-81.
- 585 SAITOH, M. 2018. Involvement of partial EMT in cancer progression. *J Biochem*, 164, 257-264.
- 586 SANTIMARIA, M., MOSCATELLI, G., VIALE, G. L., GIOVANNONI, L., NERI, G., VITI, F.,  
587 LEPRINI, A., BORSI, L., CASTELLANI, P., ZARDI, L., NERI, D. & RIVA, P. 2003.  
588 Immunoscintigraphic detection of the ED-B domain of fibronectin, a marker of  
589 angiogenesis, in patients with cancer. *Clin Cancer Res*, 9, 571-9.
- 590 SIEGEL, R. L., MILLER, K. D. & JEMAL, A. 2018. Cancer statistics, 2018. *CA Cancer J Clin*,  
591 68, 7-30.
- 592 STOTTRUP, C., TSANG, T. & CHIN, Y. R. 2016. Upregulation of AKT3 Confers Resistance to  
593 the AKT Inhibitor MK2206 in Breast Cancer. *Mol Cancer Ther*, 15, 1964-74.
- 594 SUER, S., SONMEZ, H., KARAASLAN, I., BALOGLU, H. & KOKOGLU, E. 1996. Tissue sialic  
595 acid and fibronectin levels in human prostatic cancer. *Cancer Lett*, 99, 135-7.
- 596 SUN, Y., KIM, H. S., PARK, J., LI, M., TIAN, L., CHOI, Y., CHOI, B. I., JON, S. & MOON, W.  
597 K. 2014. MRI of breast tumor initiating cells using the extra domain-B of fibronectin  
598 targeting nanoparticles. *Theranostics*, 4, 845-57.
- 599 SUN, Y., KIM, H. S., SAW, P. E., JON, S. & MOON, W. K. 2015. Targeted Therapy for Breast  
600 Cancer Stem Cells by Liposomal Delivery of siRNA against Fibronectin EDB. *Adv Healthc*  
601 *Mater*, 4, 1675-80.
- 602 TAVIAN, D., DE PETRO, G., COLOMBI, M., PORTOLANI, N., GIULINI, S. M., GARDELLA,  
603 R. & BARLATI, S. 1994. RT-PCR detection of fibronectin EDA+ and EDB+ mRNA  
604 isoforms: molecular markers for hepatocellular carcinoma. *Int J Cancer*, 56, 820-5.
- 605 TIJINK, B. M., PERK, L. R., BUDDE, M., STIGTER-VAN WALSUM, M., VISSER, G. W.,  
606 KLOET, R. W., DINKELBORG, L. M., LEEMANS, C. R., NERI, D. & VAN DONGEN,  
607 G. A. 2009. (124)I-L19-SIP for immuno-PET imaging of tumour vasculature and guidance  
608 of (131)I-L19-SIP radioimmunotherapy. *Eur J Nucl Med Mol Imaging*, 36, 1235-44.
- 609 TSANG, J. Y. S. & TSE, G. M. 2019. Molecular Classification of Breast Cancer. *Adv Anat Pathol*.
- 610 VAIDYA, A. M., SUN, Z., AYAT, N., SCHILB, A., LIU, X., JIANG, H., SUN, D., SCHEIDT,  
611 J., QIAN, V., HE, S., GILMORE, H., SCHIEMANN, W. P. & LU, Z. R. 2019. Systemic  
612 Delivery of Tumor-Targeting siRNA Nanoparticles against an Oncogenic LncRNA

613 Facilitates Effective Triple-Negative Breast Cancer Therapy. *Bioconjug Chem*, 30, 907-  
614 919.

615 VENTURA, E., WELLER, M., MACNAIR, W., ESCHBACH, K., BEISEL, C., CORDAZZO, C.,  
616 CLAASSEN, M., ZARDI, L. & BURGHARDT, I. 2018. TGF-beta induces oncofetal  
617 fibronectin that, in turn, modulates TGF-beta superfamily signaling in endothelial cells. *J*  
618 *Cell Sci*, 131.

619 WHITE, E. S., BARALLE, F. E. & MURO, A. F. 2008. New insights into form and function of  
620 fibronectin splice variants. *J Pathol*, 216, 1-14.

621 XU, J., LAMOUILLE, S. & DERYNCK, R. 2009. TGF-beta-induced epithelial to mesenchymal  
622 transition. *Cell Res*, 19, 156-72.

623 YE, X. X., ZHAO, Y. Y., WANG, Q., XIAO, W., ZHAO, J., PENG, Y. J., CAO, D. H., LIN, W.  
624 J., SI-TU, M. Y., LI, M. Z., ZHANG, X., ZHANG, W. G., XIA, Y. F., YANG, X., FENG,  
625 G. K. & ZENG, M. S. 2017. EDB Fibronectin-Specific SPECT Probe (99m)Tc-HYNIC-  
626 ZD2 for Breast Cancer Detection. *ACS Omega*, 2, 2459-2468.

627 ZAHND, C., KAWWE, M., STUMPP, M. T., DE PASQUALE, C., TAMASKOVIC, R., NAGY-  
628 DAVIDESCU, G., DREIER, B., SCHIBLI, R., BINZ, H. K., WAIBEL, R. &  
629 PLUCKTHUN, A. 2010. Efficient tumor targeting with high-affinity designed ankyrin  
630 repeat proteins: effects of affinity and molecular size. *Cancer Res*, 70, 1595-605.

631

632

633

634

635

636

637

638

639

640

641

642 **Figure Legends**

643 **Figure 1. EDB-FN overexpression in breast cancer.** **A.** Differential gene expression analysis  
644 performed on patient data from the TCGA database shows significant overexpression of EDB-FN  
645 transcript (ENST00000323926) in breast tumor samples (n=790) compared to normal breast tissue  
646 samples (n=104). Scatter dot plot denotes FPKM values and median with interquartile range,  
647 \*p<0.0001 using unpaired 2-tailed *t*-test. **B.** Endogenous expression of EDB-FN in different  
648 subtypes of breast cancer cell lines as measured by qRT-PCR. Triple negative MDA-MB-468,  
649 BT549, MDA-MB-213, and Hs578T cells exhibit significantly elevated levels of EDB-FN mRNA,  
650 compared to the hormone receptor-positive MCF7 cells. 18S expression was used as standard.  
651 Bars denote mean  $\pm$  sem (n=3). Unpaired 2-tailed *t*-test used to determine p values (\*p<0.05,  
652 \*\*p<0.01, \*\*\*p<0.001).

653 **Figure 2. Growth and morphology changes in breast cancer cells in 2D and 3D culture.** MCF7  
654 and MDA-MB-468 cells were cultured in 5 ng/mL TGF- $\beta$  for 7-15 days to obtain MCF7-TGF $\beta$   
655 and MDA-MB-468-TGF $\beta$ , cells respectively. MCF7-DR and MDA-MB-468-DR cells were  
656 obtained by inducing resistance to 500 nM Palbociclib and 100 nM Paclitaxel respectively. **A.**  
657 MCF7-TGF $\beta$  and MCF7-DR cells show distinct morphological changes, with a more  
658 mesenchymal phenotype, in 2D culture and increased ability to form spheroids in 3D Matrigel  
659 culture, compared to their parent lines. **B.** MDA-MB-468-TGF $\beta$  and MDA-MB-468-DR cells do  
660 not show visible morphological changes in 2D culture and form similar proliferative networks in  
661 3D Matrigel culture, compared to the parent counterparts.

662 **Figure 3. Increased E-M phenotype and enhanced migration in breast cancer cells with TGF-**  
663  **$\beta$  treatment and drug resistance.** qRT-PCR analysis demonstrates mRNA expression of **A.** E-  
664 cadherin, **B.** N-cadherin, and **C.** Slug in MCF7 and MDA-MB-468 following TGF- $\beta$  treatment and  
665 development of drug resistance. Western blot analysis for EMT markers shows protein expression  
666 of E-cad, N-cad, and Slug in **D.** MCF7-TGF $\beta$  and MCF7-DR and **E.** MDA-MB-468-TGF $\beta$  and  
667 MDA-MB-468-DR cells, compared to the parent MCF7 and MDA-MB-468 cells, respectively. **F.**  
668 Transwell assay shows higher invasive potential of TGF- $\beta$ -treated and drug-resistant MCF7 and  
669 MDA-MB-468 cells, evidenced by the increase in number of crystal violet-stained migrated cells.  
670 Bars denote mean  $\pm$  sem (n=3). Unpaired 2-tailed *t*-test shows \*p<0.05, #p=0.06. Scale bar = 100  
671  $\mu$ m.

672 **Figure 4. Increased EDB-FN expression in breast cancer cells with TGF- $\beta$  treatment and**  
673 **drug resistance. A.** ZD2-Cy5.5 staining of 3D cultures of breast cancer cells shows significantly  
674 increased EDB-FN expression in **A.** MCF7-TGF $\beta$  and MCF7-DR and **B.** MDA-MB-468-TGF $\beta$   
675 and MDA-MB-468-DR cells, compared to the parent MCF7 and MDA-MB-468 cells,  
676 respectively. **C.** ZD2-Cy5.5 binding to EDB-FN is abolished with RNAi of EDB-FN using  
677 ECO/siEDB-FN nanoparticles, confirming EDB-FN-specific binding of ZD2-Cy5.5. ECO/siLuc  
678 nanoparticles used as negative control. qRT-PCR analysis shows significantly upregulated mRNA  
679 expression of EDB-FN in **D.** MCF7-TGF $\beta$  and MCF7-DR and **E.** MDA-MB-468-TGF $\beta$  and  
680 MDA-MB-468-DR cells, compared to the parent MCF7 and MDA-MB-468 cells, respectively  
681 (\* $p < 0.05$ ). Bars denote mean  $\pm$  sem (n=3). Unpaired 2-tailed *t*-test shows \* $p < 0.05$ . Scale bar =  
682 100  $\mu$ m.

683 **Figure 5. Therapeutic ablation of AKT in invasive TGF- $\beta$ -treated and drug-resistant breast**  
684 **cancer cells reduces their invasion and EDB-FN overexpression. A.** TGF- $\beta$  treatment and drug  
685 resistance upregulate phospho-AKT signaling in MCF7 and MDA-MB-468 cells. **B.** Treatment of  
686 cells with AKT inhibitor MK2206-HCl (2  $\mu$ M for MCF7 and 4  $\mu$ M for MDA-MB-468 cells) for 2  
687 days results in inhibition of phospho-AKT signaling in the invasive breast cancer cell lines.  
688 Inhibition of phospho-AKT signaling by MK2206-HCl demonstrates **C and D.** reduced invasive  
689 potential of the invasive lines along with decreased expression of EDB-FN at **E and F.** mRNA  
690 levels and in **G and H.** 3D culture. **I.** Phospho-AKT depletion leads to reduced expression of N-  
691 cad and Slug in the invasive MCF7 and MDA-MB-468 breast cancer lines. **J.** TGF- $\beta$  treatment  
692 and drug resistance upregulate phosphorylation of SRp55 in MCF7 and MDA-MB-468 cells. **K.**  
693 This upregulation is abolished with MK2206-HCl-mediated depletion of phospho-AKT signaling,  
694 suggesting a potential role of SRp55 in the inclusion of EDB-FN exon. Bars denote mean  $\pm$  sem  
695 (n=3). Unpaired 2-tailed *t*-test shows \* $p < 0.05$ . Scale bar = 100  $\mu$ m.

696

697

698



699

700 **Figure 1**



701

702

703 **Figure 2**

**A**



**B**



704

705

706 **Figure 3**

707



708

709 **Figure 4**



710

711

712

713 **Figure 5**

714



715

716

717
